# Supplementary material for: Global analysis of gene expression dynamics within the marine microbialcommunity during the VAHINE mesocosm experiment in the southwest Pacific
Source: Copernicus journal article supplement (doi:10.5194/bg-13-4135-2016), 2016-07-19
Supplement: Supplementary file 1 [file bg-13-4135-2016-supplement.zip]

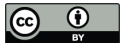

*Supplement of*

**Global analysis of gene expression dynamics within the marine microbial community during the VAHINE mesocosm experiment in the southwest Pacific**

**Ulrike Pfreundt et al.**

*Correspondence to:* Wolfgang R. Hess ([wolfgang.hess@biologie.uni-freiburg.de](mailto:wolfgang.hess@biologie.uni-freiburg.de))

- [bg-13-4135-2016-supplement-title-page.pdf](#)
- [SI\\_12FEB16.pdf](#)
- [Supplementary Table S1.xlsx](#)

The copyright of individual parts of the supplement might differ from the CC-BY 3.0 licence.
