# Supplementary material for: Global analysis of gene expression dynamics within the marine microbialcommunity during the VAHINE mesocosm experiment in the southwest Pacific
Source: Copernicus journal article supplement (doi:10.5194/bg-13-4135-2016), 2016-07-19
Supplement: Supplementary file 2 [file bg-13-4135-2016-supplement.zip]

Archive with 3 entries (3 files):
- SI_12FEB16.pdf
- Supplementary Table S1.xlsx
- bg-13-4135-2016-supplement-title-page.pdf
